# Supplementary material for: Probiotic Monotherapy with Lactobacillus reuteri (Prodentis) as a Coadjutant to Reduce Subgingival Dysbiosis in a Patient with Periodontitis
Source: MDPI journal article supplement (doi:10.3390/ijerph19137835), 2022-06-26
Supplement: s1 [file s1]

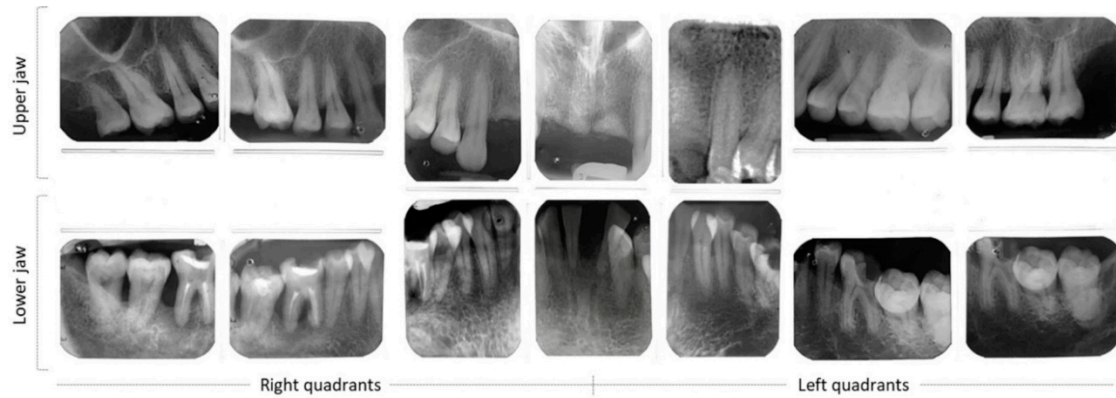

**Figure S1.** Periapical radiographs of the full mouth. The patient had 25 teeth, with a periodontal diagnosis of generalized periodontitis, stage IV, grade B [4]. The missing teeth observed at baseline (T0) correspond to the upper central and lateral incisors, the lower left incisor, and the upper first molars.

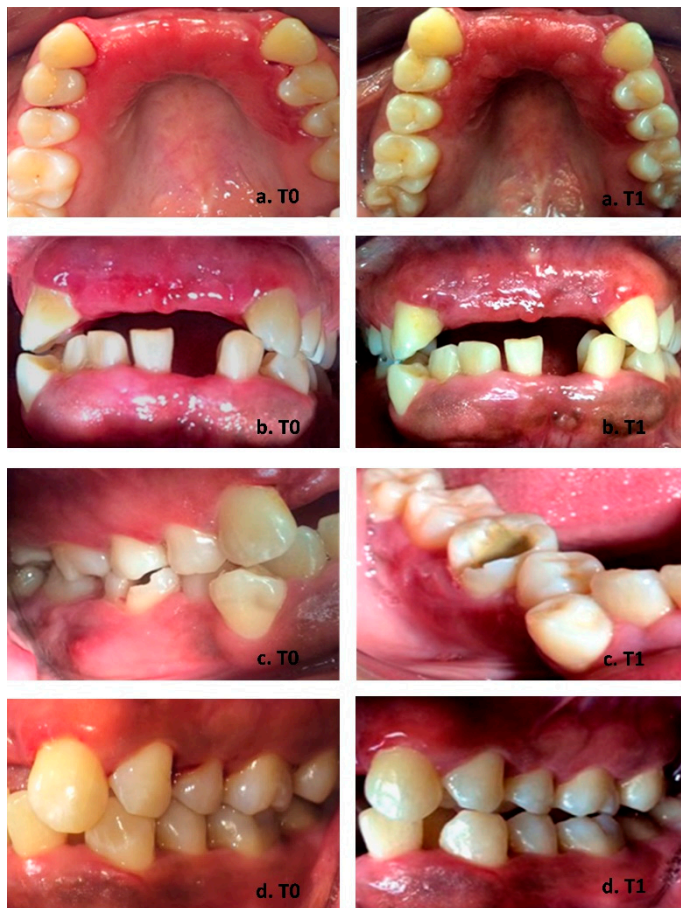

**Figure S2.** Representative clinical images. T0: baseline and T1: one month of *L. reuteri* Prodentis consumption. a. Occlusal view; b. Upper incisors region; c. Tooth 46; and d. Left molars region.
